# Supplementary material
Source: PubMed Central journal article supplement (PMC8014302)
Supplement: NIHMS1682517-supplement-Additional_References.pdf [file NIHMS1682517-supplement-Additional_References.pdf]

### Additional References

- s1. Lam JM, Wodchis WP. The relationship of 60 disease diagnoses and 15 conditions to preference-based health-related quality of life in Ontario hospital-based long-term care residents. *Medical care*. 2010; **48**(4): 380-7.
- s2. Koleck M, Gana K, Lucot C, Darrigrand B, Mazaux JM, Glize B. Quality of life in aphasic patients 1 year after a first stroke. *Quality of life research*. 2017; **26**(1): 45-54.
- s3. Fridriksson, J. & Smith, K. (2016). Neuroplasticity Associated with Treated Aphasia Recovery. *Neurobiology of Language*, 1007-1013.
- s4. Mohr, B. (2017). Neuroplasticity and Functional Recovery after Intensive Language Therapy in Chronic Post Stroke Aphasia: Which Factors Are Relevant? *Frontiers in Human Neuroscience*, 11:332.
- s5. Draganski, B., & May, A. (2008). Training-induced structural changes in the adult human brain. *Behavioural brain research*, 192(1), 137-142.
- s6. Liuzzi AG, Bruffaerts R, Peeters R, Adamczuk K, Keuleers E, De Deyne S, et al. Cross-modal representation of spoken and written word meaning in left pars triangularis. *NeuroImage*. 2017; **150**: 292-307.
- s7. Matchin W, Hammerly C, Lau E. The role of the IFG and pSTS in syntactic prediction: Evidence from a parametric study of hierarchical structure in fMRI. *Cortex*. 2017; **88**: 106-23.
- s8. Fridriksson J. Preservation and modulation of specific left hemisphere regions is vital for treated recovery from anomia in stroke. *The Journal of neuroscience*. 2010; **30**(35): 11558-64.
- s9. Ward, N. S., Brown, M. M., Thompson, A. J., & Frackowiak, R. S. J. (2003). Neural correlates of motor recovery after stroke: a longitudinal fMRI study. *Brain*, 126(11), 2476-2496.
- s10. Ulm L, Copland D, Meinzer M. A new era of systems neuroscience in aphasia? *Aphasiology*. 2018;**32**(7): 1-23.
- s11. Schlaug G, Marchina S, Norton A. Evidence for plasticity in white-matter tracts of patients with chronic Broca's aphasia undergoing intense intonation-based speech therapy. *Annals of the New York Academy of Sciences*. 2009; **1169**: 385-94.
- s12. Honey, C. J., Thivierge, J. P., & Sporns, O. (2010). Can structure predict function in the human brain?. *Neuroimage*, 52(3), 766-776. [Ref if needed: Draganski, B., & May, A. (2008). Training-induced structural changes in the adult human brain. *Behavioural brain research*, 192(1), 137-142.
- s13. Hartwigsen G, Saur D. Neuroimaging of stroke recovery from aphasia - Insights into plasticity of the human language network. *NeuroImage*. 2017.
- s14. Torres J, Drebing D, Hamilton R. TMS and tDCS in post-stroke aphasia: Integrating novel treatment approaches with mechanisms of plasticity. *Restorative neurology and neuroscience*. 2013; **31**(4): 501-15.
- s15. Kapoor A. Repetitive transcranial magnetic stimulation therapy for post-stroke non-fluent aphasia: A critical review. *Topics in stroke rehabilitation*. 2017; **24**(7): 547-53.
- s16. Fertonani A, Miniussi C. Transcranial Electrical Stimulation: What We Know and Do Not Know About Mechanisms. *The Neuroscientist*. 2016.
- s17. Jamil A, Batskadze G, Kuo HI, Labruna L, Hasan A, Paulus W, et al. Systematic evaluation of the impact of stimulation intensity on neuroplastic after-effects induced by transcranial direct current stimulation. *The Journal of physiology*. 2017; **595**(4): 1273-88.
- s18. Shah PP, Szaflarski JP, Allendorfer J, Hamilton RH. Induction of neuroplasticity and recovery in post-stroke aphasia by non-invasive brain stimulation. *Frontiers in human neuroscience*. 2013; **7**: 888.
- s19. Baker JM, Rorden C, Fridriksson J. Using transcranial direct-current stimulation to treat stroke patients with aphasia. *Stroke*. 2010; **41**(6): 1229-36.
- s20. Fridriksson J, Richardson JD, Baker JM, Rorden C. Transcranial direct current stimulation improves naming reaction time in fluent aphasia: a double-blind, sham-controlled study. *Stroke*. 2011; **42**(3): 819-21.
- s21. Floel A, Meinzer M, Kirstein R, Nijhof S, Deppe M, Knecht S, et al. Short-term anomia training and electrical brain stimulation. *Stroke*. 2011; **42**(7): 2065-7.

- s22. Ren CL, Zhang GF, Xia N, Jin CH, Zhang XH, Hao JF, et al. Effect of low-frequency rTMS on aphasia in stroke patients: a meta-analysis of randomized controlled trials. *PLoS one*. 2014; **9**(7): e102557.
- s23. Otal B, Olma MC, Floel A, Wellwood I. Inhibitory non-invasive brain stimulation to homologous language regions as an adjunct to speech and language therapy in post-stroke aphasia: a meta-analysis. *Frontiers in human neuroscience*. 2015; **9**: 236.
- s24. Shah-Basak PP, Wurzman R, Purcell JB, Gervits F, Hamilton R. Fields or flows? A comparative metaanalysis of transcranial magnetic and direct current stimulation to treat post-stroke aphasia. *Restorative neurology and neuroscience*. 2016; **34**(4): 537-58.
- s25. Dmochowski JP, Datta A, Huang Y, Richardson JD, Bikson M, Fridriksson J, et al. Targeted transcranial direct current stimulation for rehabilitation after stroke. *NeuroImage*. 2013; **75**: 12-9.
- s26. Meinzer M, Flaisch T, Breitenstein C, Wienbruch C, Elbert T, Rockstroh B. Functional re-recruitment of dysfunctional brain areas predicts language recovery in chronic aphasia. *NeuroImage*. 2008; **39**(4): 2038-46.
- s27. Sale MV, Mattingley JB, Zalesky A, Cocchi L. Imaging human brain networks to improve the clinical efficacy of non-invasive brain stimulation. *Neuroscience and biobehavioral reviews*. 2015; **57**: 187-98.
- s28. Turkeltaub PE, Swears MK, D'Mello AM, Stoodley CJ. Cerebellar tDCS as a novel treatment for aphasia? Evidence from behavioral and resting-state functional connectivity data in healthy adults. *Restorative neurology and neuroscience*. 2016; **34**(4): 491-505.
- s29. Pascual-Leone, A., Amedi, A., Fregni, F., Merabet, L. B. (2005). The plastic human brain cortex. *Annual Review of Neuroscience*, 28:377–401.
- s30. Naeser, MA, Martin, PI, Nicholas, M, Baker, EH, Seekins, H, Kobayashi, M, Theoret, H, Felipe Fregni, F, Maria-Tormos, J, Kurlanda, J, Dorona, KW, Pascual-Leone, A. (2005). Improved picture naming in chronic aphasia after TMS to part of right Broca's area: An open-protocol study. *Brain and Language* 93, 95–105.
- s31. Kleim JA, Jones TA. Principles of experience-dependent neural plasticity: implications for rehabilitation after brain damage. *Journal of speech, language, and hearing research : JSLHR*. 2008; **51**(1): S225-39.
- s32. Nudo RJ. Recovery after brain injury: mechanisms and principles. *Frontiers in human neuroscience*. 2013; **7**: 887.
- s33. Worrall L, Brandenburg C, Shrubsole K. Neuroscientific Implications in Assessment and Intervention for Aphasia. *Folia Phoniatr Logop*. 2015; **67**(6): 285-92.
- s34. Cherney LR, Patterson JP, Raymer A, Frymark T, Schooling T. Evidence-based systematic review: effects of intensity of treatment and constraint-induced language therapy for individuals with stroke-induced aphasia. *Journal of speech, language, and hearing research : JSLHR*. 2008; **51**(5): 1282-99.
- s35. Warren, S.F., Fey, M.E., & Yoder, P.J. (2007). Differential treatment intensity research: A missing link to creating optimally effective communication interventions. *Mental Retardation and Developmental Disabilities Research Reviews*, 13, 70-77.
- s36. Godecke E, Rai T, Ciccone N, Armstrong E, Granger A, Hankey GJ. Amount of therapy matters in very early aphasia rehabilitation after stroke: a clinical prognostic model. *Seminars in speech and language*. 2013; **34**(3): 129-41.
- s37. Patterson JP, Raymer A, Cherney L. Treatment intensity in aphasia rehabilitation. In: Coppens P, Patterson JP, editors. *Aphasia Rehabilitation: Clinical Challenges*. Burlington, MA: Jones & Bartlett Learning; 2018.
- s38. Kiran S. Typicality of inanimate category exemplars in aphasia treatment: further evidence for semantic complexity. *Journal of speech, language, and hearing research : JSLHR*. 2008; **51**(6): 1550-68.
- s39. Thompson CK, Shapiro LP. Treating agrammatic aphasia within a linguistic framework: Treatment of Underlying Forms. *Aphasiology*. 2005; **19**(10-11): 1021-36.

s40. Kiran S. How Does Severity of Aphasia Influence Individual Responsiveness to Rehabilitation? Using Big Data to Understand Theories of Aphasia Rehabilitation. *Seminars in speech and language*. 2016; **37**(1): 48-59.
